# Supplementary material
Source: publisher site journal article supplement (https://www.dovepress.com/article/371370)
Supplement: Supplementary file 1 [file get_supplementary_file.php]

**Lysophosphatidylcholine (17:0) improves HFD-induced hyperglycemia & insulin resistance: A mechanistic mice model study**

Li Bao1,2, Ying Zhang2,3, Sichao Yan1,2, Dan Yan2,3, Dechun Jiang1,2,*

1 Department of Pharmacy, Beijing Shijitan Hospital, Capital Medical University, Beijing, China; 2 Beijing Key Laboratory of Bio-characteristic Profiling for Evaluation of Rational Drug Use, Beijing, China; 3Department of Pharmacy, Beijing Friendship Hospital, Capital Medical University, Beijing, China.

Correspondence: Professor, Dechun Jiang

Department of Pharmacy, Beijing Shijitan Hospital, Capital Medical University, No.10 Tieyi-Road, Haidian District, 10038, Beijing, China

Tel: +86-10-63926723

Email: jdc@bjsjth.cn


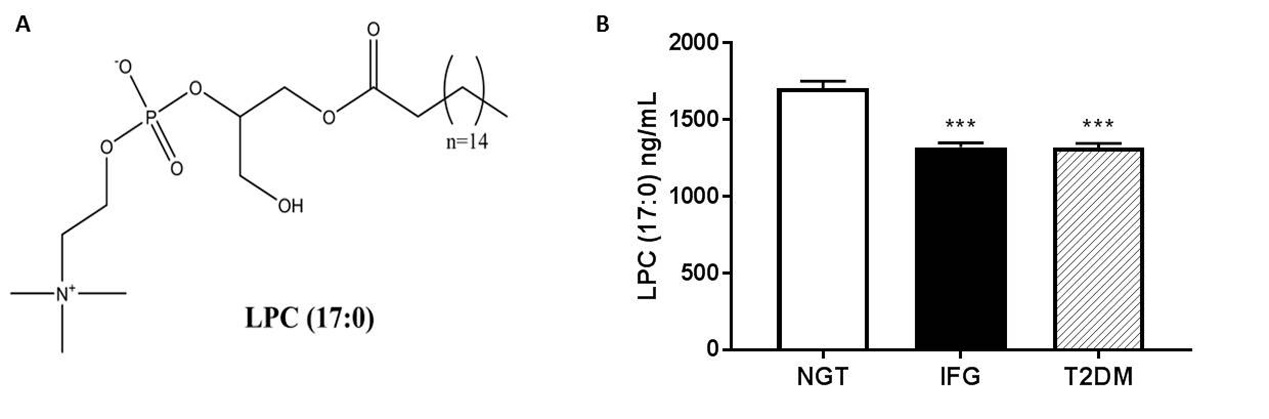


**Figure S1** Structures of LPC (17:0) (A) and the LPC (17:0) content in human serum (B).

NGT: normal glucose tolerance (n=314), IFG: impaired fasting glucose (n=318), T2DM: type 2 diabetes mellitus (n=368). Data are presented as the mean ± standard error of the mean (SEM), Statistical analysis was done using one-way ANOVA followed by the Turkey post hoc test. ∗∗∗P < 0.001 compared with NGT. (**B**) Adapted from Long JL, Yang H, Yang ZR, et al. Integrated biomarker profiling of the metabolome associated with impaired fasting glucose and type 2 diabetes mellitus in large-scale Chinese patients. *Clin Transl Med*. 2021;11(6):e432. © 2021 The Authors. Clinical and Translational Medicine published by John Wiley & Sons Australia, Ltd on behalf of Shanghai Institute of Clinical Bioinformatics.7


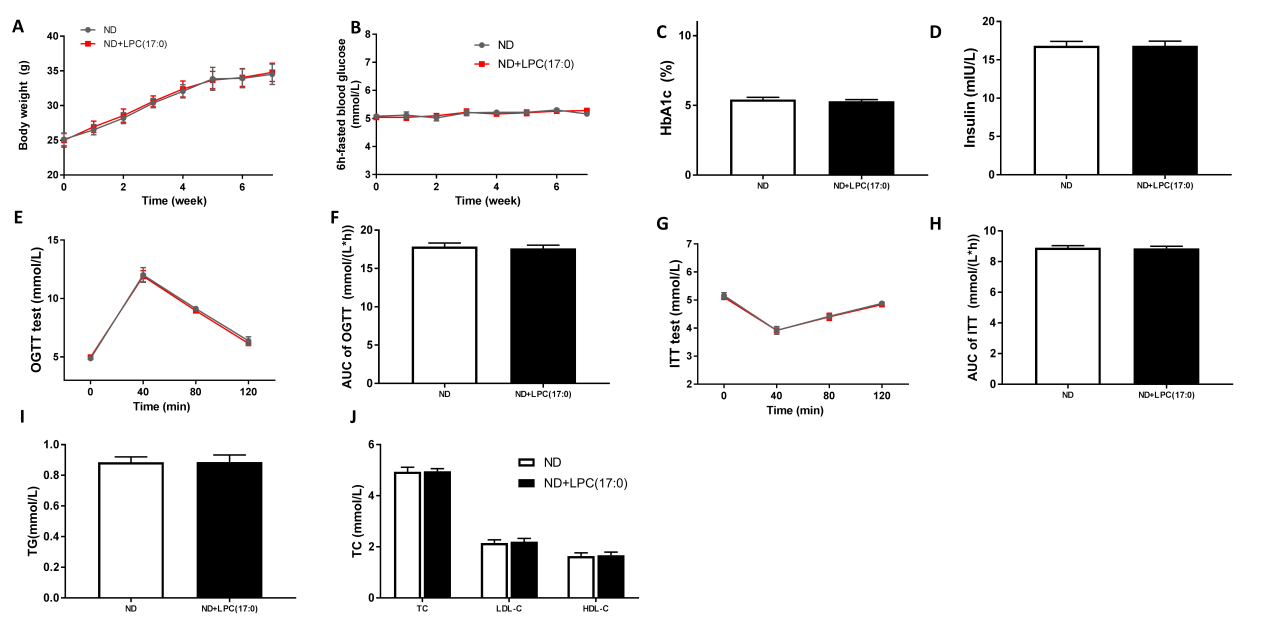


**Figure S2** LPC (17:0) had no effect on the metabolic characteristics in normal-diet mice (A) Body weight, (B) 6h-fasted blood glucose, (C)HbA1c, (D) Plasma insulin, (E) OGTT and (F) AUC, (G) ITT and (H) AUC, (I) serum TG, (J) serum TC, LDL-C and HLD-C, Data are presented as the mean ± standard error of the mean (SEM); N = 5 mice per group.

**Figure S3** LPC (17:0) inhibited the appetite of HFD mice.
